# Supplementary material for: Fabrication of a P–Si/ZnO heterojunction based on galvanic cell driven and the complete degradation of RhB via fast charge transfer
Source: Royal Society of Chemistry journal article supplement (doi:10.1039/d3nr04078j), 2023-01-01
Supplement: d3nr04078j1.pdf [file d3nr04078j1.pdf]

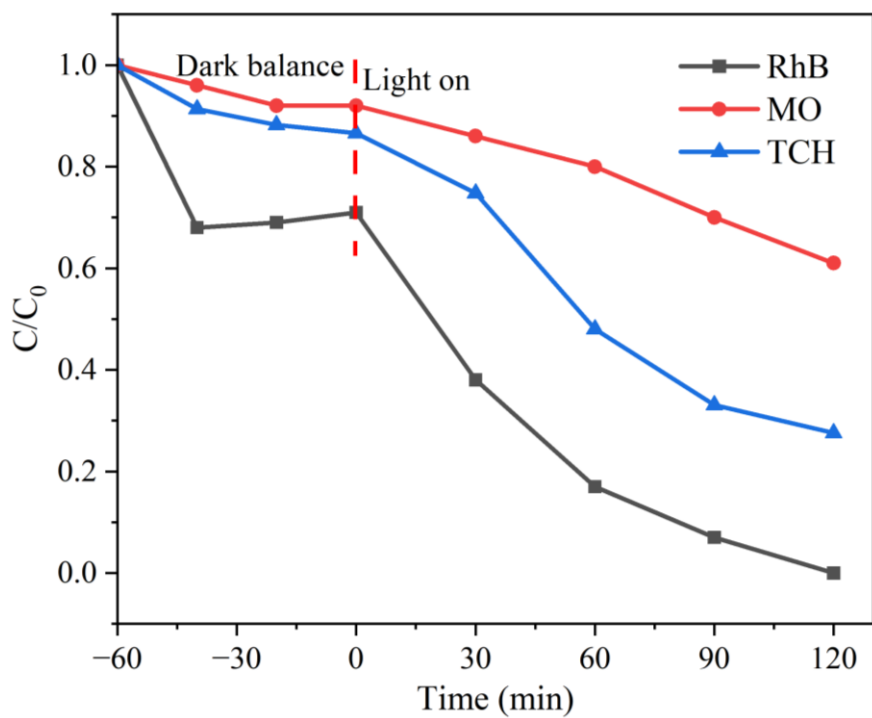

Fig. S1 Photocatalytic degradation curves of RhB, MO and TCH over P-Si/ZnO-90°C after 120 min of UV-Vis light irradiation. Experimental conditions: Substrate, 5 mg L<sup>-1</sup>
